# Supplementary material for: Double perovskite compounds A2CuWO6(A = Sr and Ba) with p-type semiconductivity for photocatalytic water oxidation under visible light illumination
Source: Royal Society of Chemistry journal article supplement (doi:10.1039/c9qi00675c), 2019-01-01
Supplement: c9qi00675c1.pdf [file c9qi00675c1.pdf]

## Supplementary Information

### Double perovskite compounds $A_2CuWO_6$ (A = Sr and Ba) with p-type semiconductivity for photocatalytic water oxidation under visible light illumination

Erbing Hua<sup>a,b,†</sup>, Shu Jin<sup>a,†</sup>, Shuang Ni<sup>c</sup> and Xiaoxiang Xu<sup>a, b\*</sup>

<sup>a</sup>*Clinical and Central Lab, Putuo People's Hospital, Tongji University, 1291 Jiangning Road,  
Shanghai, 200060, China*

<sup>b</sup>*Shanghai Key Lab of Chemical Assessment and Sustainability, School of Chemical Science and  
Engineering, Tongji University, 1239 Siping Road, Shanghai, 200092, China, Email:  
[xxxu@tongji.edu.cn](mailto:xxxu@tongji.edu.cn), telephone: +86-21-65986919*

<sup>c</sup>*Science and Technology on Plasma Physics Laboratory, Laser Fusion Research Center, China  
Academy of Engineering Physics, Mianyang 621900, China*

† These authors contribute equally.

\* Corresponding authors

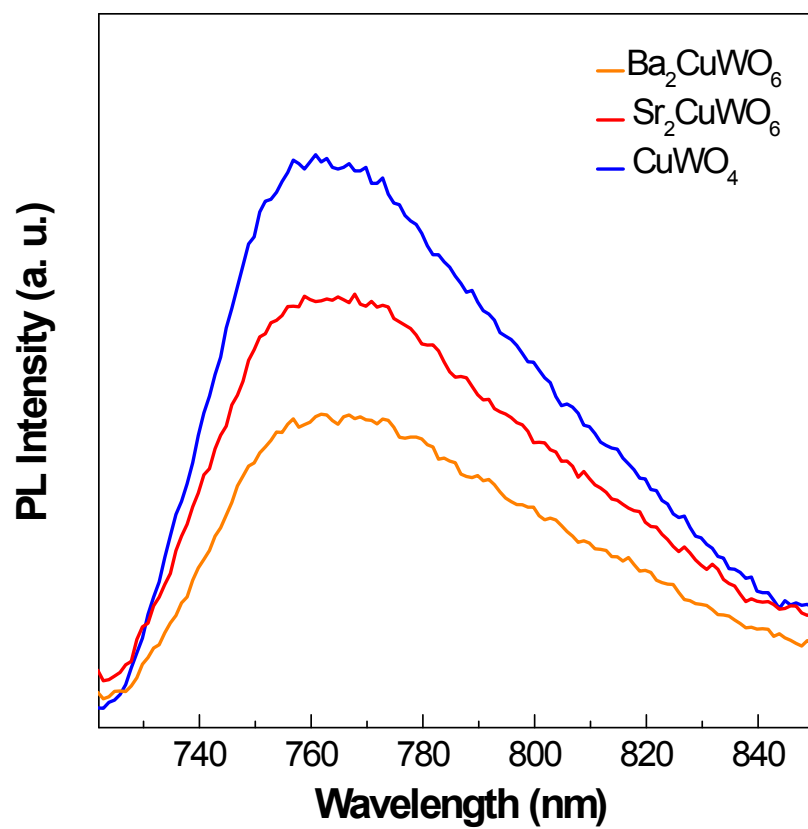

Figure S1. PL spectra of  $\text{CuWO}_4$ ,  $\text{Sr}_2\text{CuWO}_6$  and  $\text{Ba}_2\text{CuWO}_6$  with 465 nm laser light source.
